# Supplementary material
Source: HighWire-hosted journal article supplement (https://bmjopen.bmj.com/content/12/3/e061838)
Supplement: inline-supplementary-material-1 [file inline-supplementary-material-1.pdf]

**Supplementary file 1 for protocol paper:****The use of selective gut decontamination in critically ill children: Paediatric Care and Infection Control (PICnIC): A protocol of a pilot cluster randomised trial****How does SDD work?**

SDD paste and SDD suspension are both formulations containing three non-absorbable antibiotics and antifungals: colistin (polymyxin E), tobramycin and nystatin. All three are licensed antibacterial and antifungal drugs, and are currently used in critically ill patients when indicated.

In SDD therapy, the drugs are used to eradicate the gastro-intestinal carriage of potentially pathogenic micro-organisms including *Staphylococcus aureus*, methicillin-resistant *Staphylococcus aureus* (MRSA), aerobic Gram-negative bacilli and yeasts.<sup>1</sup>

The drugs are non-absorbable, ensuring that their concentrations remain high enough in the mouth and into the colon to selectively eradicate the carriage of pathogenic micro-organisms, whilst not influencing the protective anaerobic flora, thereby decreasing colonisation resistance.<sup>1</sup>

*Colistin* is a multicomponent antibiotic. It is a mixture of several closely related decapeptides (polymyxin E). The main components are polymyxin E1 and E2. Colistin has an antimicrobial spectrum and mode of action similar to that of polymyxin B, but is slightly less active. It is bactericidal to most Gram-negative bacteria.<sup>1</sup>

*Tobramycin sulphate* is an aminoglycoside antibiotic with good aqueous solubility. It acts against many strains of Gram-negative bacteria, including *Pseudomonas aeruginosa*.<sup>1</sup>

Colistin and tobramycin act in synergy against *Proteus* and *Pseudomonas* species, and offer the most potent anti-pseudomonal combination, with an effective clearance of *Pseudomonas* from the gut. Both agents absorb endotoxin released by aerobic Gram-negative bacilli. This feature is important because endotoxin can be absorbed into the bloodstream from the gut of seriously ill patients. This contributes to fever, inflammatory activation, shock and organ failure.<sup>1,2</sup>

Emergence of resistance to colistin is rare. Although there are bacteria producing tobramycin-inactivating enzymes, colistin is thought to protect tobramycin from being destroyed by these enzymes. Tobramycin is intrinsically the most active aminoglycoside against *Pseudomonas*, and is minimally inactivated by saliva and faeces.

In critically ill patients, the use of intravenous antimicrobials suppress the patient's commensal species in the gastrointestinal tract. This is associated with overgrowth of extended-spectrum beta-lactamase (ESBL)-producing aerobic Gram-negative bacilli in the gut. The action of enteral colistin and tobramycin against aerobic Gram-negative bacilli prevents the persistence of ESBL producing aerobic Gram-negative bacilli.<sup>3</sup>

*Nystatin* is a non-absorbable polyene drug with wide antifungal activity, especially against *Candida* species. It significantly reduces fungal carriage and overall fungal infections and is less likely to promote the emergence of resistant candidal strains compared to other antifungal agents.<sup>4</sup> It also has advantages of low cost and absence of side effects.<sup>4</sup>

The most widely used SDD regimen to date uses amphotericin B in combination with polymyxin (colistin) and tobramycin. For PICnIC, nystatin is used in place of amphotericin B

due to difficulties sourcing amphotericin B. Nystatin, like amphotericin B is a non-absorbable polyene with wide antifungal activity.<sup>4</sup>

### How is SDD administered?

Every six hours a 'pea-sized' amount (0.5 g) of SDD paste will be topically applied to the buccal mucosa and oropharynx and an SDD suspension is administered to the gastrointestinal tract via the most proximal feeding tube, with dosing according to age (Supplementary Table 1):

**Supplementary Table 1:** SDD suspension dosing

|                                   | 0 – 4 years              | 5 – 12 years           | ≥13 years              |
|-----------------------------------|--------------------------|------------------------|------------------------|
| <b>Polymyxin E<br/>(Colistin)</b> | 25mg                     | 50mg                   | 100mg                  |
| <b>Tobramycin</b>                 | 20mg                     | 40mg                   | 80mg                   |
| <b>Nystatin</b>                   | 0.5 x 10 <sup>6</sup> IU | 1 x 10 <sup>6</sup> IU | 2 x 10 <sup>6</sup> IU |
|                                   | <b>2.5ml</b>             | <b>5ml</b>             | <b>10ml</b>            |

### Similarity to other compounds

The most widely used SDD regimen to date is a combination of polymyxin E (colistin), tobramycin and amphotericin B applied as an oral paste and suspension to treat both the throat and gut, respectively.

For PICNIC, nystatin will be used in place of amphotericin B due to difficulties sourcing amphotericin B. Nystatin, like amphotericin B is a non-absorbable polyene with wide antifungal activity.<sup>5</sup> Nystatin may prevent the emergence of resistant fungal strains such as candida species and has advantages such as its low cost and absence of side effects.

### Chemistry, Manufacturing and controls.

The SDD paste and suspension has been manufactured in accordance with Good Laboratory Practice (GLP) and Good Manufacturing Practice (GMP) for clinical studies (See Appendix 1 for Verita Pharma GMP licence).

### Development plan

An unpublished, inception cohort pilot study testing inclusion criteria and examining process measures and outcomes was conducted in an adult population by collaborators at The George Institute and informed the development of the PICNIC protocol. The outcomes of this study will inform the development of a full trial within paediatrics.

### Physical, Chemical and pharmaceutical properties and formulation.

#### Study Drugs.

The active pharmaceutical ingredients of both the SSD paste (Supplementary Table 2) and SDD suspension (Supplementary Table 3) are colistin sulphate, tobramycin sulphate and nystatin.

**Supplementary Table 2: Composition and Characteristics of SDD paste.**

|                                  |                                                                                                                                                                                                                                                                                                               |
|----------------------------------|---------------------------------------------------------------------------------------------------------------------------------------------------------------------------------------------------------------------------------------------------------------------------------------------------------------|
| Name                             | SDD paste                                                                                                                                                                                                                                                                                                     |
| International nomenclature       | The paste is a semi-solid dosage forms containing finely dispersed solids, have a stiff consistency, and is intended for topical application.<br>Active pharmaceutical ingredients:<br>Colistin sulphate<br>Tobramycin (as sulphate)<br>Nystatin                                                              |
| Sponsor name                     | The George Institute for Global Health                                                                                                                                                                                                                                                                        |
| Chemical abstract service number | Colistin : 1264-72-8<br>Tobramycin: 49842-07-1<br>Nystatin: 1400-61-9                                                                                                                                                                                                                                         |
| Chemical structure               | Colistin Sulphate<br>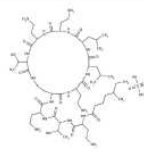<br>Tobramycin<br><br>Nystatin<br> |
| Molecular formula                | Colistin : $2(C_{52}H_{96}N_{16}O_{13}) \cdot 5(H_2SO_4)$<br>Tobramycin: $C_{18}H_{37}N_5O_9$<br>Nystatin: $C_{47}H_{75}NO_{17}$                                                                                                                                                                              |
| Molecular weight                 | Colistin: 2801 g/mol<br>Tobramycin: 467.5 g/mol<br>Nystatin: 926.1 g/mol                                                                                                                                                                                                                                      |
| Description                      | SDD paste is a mixture of antimicrobial powders – colistin sulphate, tobramycin sulphate and nystatin- with mineral oil light, petrolatum white and methocel E4M premium in an oral syringe.                                                                                                                  |
| Odour                            | Not applicable                                                                                                                                                                                                                                                                                                |
| Solubility                       | Not applicable                                                                                                                                                                                                                                                                                                |
| Properties                       | A smooth, yellow paste of uniform consistency                                                                                                                                                                                                                                                                 |

**Supplementary Table 3:** Composition and characteristics of SDD suspension.

|                                  |                                                                                                                                                                                                                                                                                                                                                            |
|----------------------------------|------------------------------------------------------------------------------------------------------------------------------------------------------------------------------------------------------------------------------------------------------------------------------------------------------------------------------------------------------------|
| Name                             | SDD suspension                                                                                                                                                                                                                                                                                                                                             |
| International nomenclature       | The suspensions is liquid preparations containing drug substance(s) and consist of solid particles dispersed throughout a liquid phase in which the particles are present in excess of the solubility. Some suspensions are prepared and ready for use, while others are solid mixtures intended for constitution before use with an appropriate vehicle.  |
| Sponsor name                     | As per SDD paste                                                                                                                                                                                                                                                                                                                                           |
| Chemical abstract service number | As per SDD paste                                                                                                                                                                                                                                                                                                                                           |
| Structure                        | As per SDD paste                                                                                                                                                                                                                                                                                                                                           |
| Molecular formula                | As per SDD paste                                                                                                                                                                                                                                                                                                                                           |
| Molecular weight                 | As per SDD paste                                                                                                                                                                                                                                                                                                                                           |
| Description                      | SDD powder for suspension is a blend of antimicrobial powders- colistin sulphate, tobramycin sulphate and nystatin with a suspending agent (syrspend pH 4 dry), a preservative (potassium sorbate) and citric acid monohydrate in a bottle. Before use, each bottle is reconstituted with purified/distilled water to the required volume and then shaken. |
| Odour                            | Not applicable                                                                                                                                                                                                                                                                                                                                             |
| Solubility                       | Part of the powder will be dissolved and part suspended                                                                                                                                                                                                                                                                                                    |
| Properties                       | SDD suspension; after suspending: an opaque, straw coloured liquid                                                                                                                                                                                                                                                                                         |

**Manufacture.**

The SDD paste and SDD suspension are manufactured through a series of proprietary processing steps and performed in accordance with GLP/GMP under licence at:

Verita Pharma Pty LTD  
Unit 3, 4 Endeavour Rd  
Taren Point  
NSW 2229  
Australia

**Analysis and characterisation of study drug.**

The identity of each container within each batch of raw material destined for study drug is confirmed by full pharmacopoeia analysis by validated high-performance liquid chromatography (HPLC) and microbiology methodology (in accordance with annex 8 of Pharmaceutical Inspection Co-operation Scheme guide to GMP manufacturing).

Homogeneity and potency of each finished product batch of investigational product is confirmed via similar methodology.

Impurities will be assessed by Verita Pharma using HPLC and other analytical methods during on-going stability studies.

**Stability**

The manufacturer stability testing program is focused on determining allowable shelf-life and ensuring the product maintains compliance with the claims made on the SDD paste and SDD suspension labels when exposed to routine usage and storage conditions.

Stability testing uses HPLC and microbiology analyses to ensure that study drugs remains homogenous, with potency within specifications and exhibits normally expected physical

characteristics, when stored for defined durations, at the ranges of temperature and subjected to reasonably expected temperature excursions.

## Investigational products

### Formulation.

#### SDD paste

The clinical products are formulated by combining the ingredients shown in Supplementary Table 4 using a series of proprietary processing steps prior dispensing into 1ml oral syringes. SDD paste is formulated to contain per 0.5g paste: colistin sulphate 10 mg tobramycin 10 mg and nystatin 125,000 IU.

**Supplementary Table 4:** General Investigational drug product information.

| Ingredient               | Specification         | Purpose   | Conc. (per gram) |
|--------------------------|-----------------------|-----------|------------------|
| Colistin sulphate        | BP                    | Active    | 20mg             |
| Nystatin                 | Eur. Ph. 8th ed. (BP) | Active    | 0.25mu           |
| Tobramycin (as sulphate) | USP                   | Active    | 20mg             |
| Mineral oil light        | USP                   | Excipient | 50mg             |
| Methocel e4m premium     | USP                   | Excipient | 177mg            |
| Petrolatum white         | USP                   | Excipient | 686mg*           |

BP = British Pharmacopoeia provides quality standards for UK pharmaceutical substances and medicinal products

Eur.Ph.8th ed.= European Pharmacopoeia 8th Edition is Europe's scientific and legal benchmark for pharmacopoeia standards

USP = United States Pharmacopeia has established standards for manufacturing and supplying drugs worldwide

Active = an active component in a medicines final formulation

Excipient = an excipient is an inactive substance for the purpose of bulking-up drug formulations

Methocel e4m premium = a renewable raw material, are water soluble polymer derived from cellulose

Petrolatum white = semi-solid mixture of hydrocarbons.

\* For 'petrolatum white' quantity added to batch is calculated to quantum satis

#### SDD suspension

The clinical products are formulated by combining the ingredients shown in Supplementary Table 5 using a series of proprietary processing steps and dispensing into defined aliquots within each polyethylene terephthalate (PET) bottle, for storage. When the product is required for the trial, each bottle of antimicrobial powder is reconstituted to the desired volume with purified/distilled water. The formulation includes a suspending agent (SyrSpend sf ph4) to ensure that when the bottle is standing, the active powder (Nystatin) is evenly dispersed after shaking between administrations to the patient, thereby preventing 'caking' on the bottom of the bottle. Due to the difficulties experienced at participating sites in achieving consistent reconstitution and the increased viscosity (thickening) of the suspension after 3 days, the formulation was modified in September 2018 to reduce the amount of SyrSpend by 30%. The removal of 30% suspending agent has no influence on product efficacy, chemical attributes or on the active components.

**Supplementary Table 5:** General investigational drug product information

| Ingredient               | Specification         | Purpose      | Concentration After reconstitution per ml |
|--------------------------|-----------------------|--------------|-------------------------------------------|
| Colistin sulphate        | BP                    | Active       | 10mg                                      |
| Nystatin                 | Eur. Ph. 8th ed. (BP) | Active       | 0.20mu                                    |
| Tobramycin (as sulphate) | USP                   | Active       | 8mg                                       |
| Syrspend sf pH4          | USP                   | Excipient    | 45.5mg                                    |
| Citric acid monohydrate  | BP                    | Excipient    | 2.86mg                                    |
| Potassium sorbate        | USP                   | Preservative | 2.0mg                                     |

BP = British Pharmacopoeia provides quality standards for UK pharmaceutical substances and medicinal products

Eur.Ph.8<sup>th</sup> ed. = European Pharmacopoeia 8<sup>th</sup> Edition is Europe's scientific and legal benchmark for pharmacopoeia standards

USP = United States Pharmacopoeia has established standards for manufacturing and supplying drugs worldwide

Active = an active component in a medicines final formulation

Excipient = an excipient is an inactive substance for the purpose of bulking-up drug formulations

Preservative = a natural or synthetic chemical that prevents decomposition by microbial growth or by undesirable chemical changes

Syrspend sf pH4 = is a ready-to-use, all-in-one suspending and sweetening oral liquid

Citric acid monohydrate = a tricarboxylic acid and maintains stability of active ingredients

Potassium sorbate = is the potassium salt of sorbic acid, commonly used preservative in the conservation of liquid pharmaceutical preparations.

### Final dosage form and presentation

SDD paste (0.5g) is supplied in 1ml BD oral syringe and is stored at 2-8°C. During patient use the paste can be stored in a temperature-controlled room of less than 25°C for up to one week. SDD suspension is supplied in antimicrobial powder form in a sealed PET bottle with a syringe filling adaptor under a child resistant screwcap and is stored at 2-8°C. After reconstitution of the powder, the suspension can be stored in a temperature-controlled room of less than 25°C for up to one week.

### Container and packaging

Each SDD study drug kit contains, twenty 1ml BD oral syringes SDD paste, a single sealed PET bottle of SDD suspension (powder form) and a syringe filling adaptor and shipped under refrigerated/cold chain 2-8°C (35°–46°F) conditions to the clinical trial site.

### Storage and handling

The SDD study drug kits are to be stored at 2–8°C (35°–46°F) in a secure area. When SDD powder is reconstituted into suspension the drug kit (paste and suspension) can be stored in a temperature controlled room of less than 25°C for up to 1 week. Each pre-filled syringe is to be discarded after use (i.e. single use only). The PET bottle is to be returned to the SDD study drug kit after each dose. Hospitals will need to provide their own 10ml oral/enteral syringe to access and measure each dose from the PET bottle (which contains a syringe filling adaptor).

### Shelf life

There is no information in the literature regarding stability testing of drugs containing colistin sulphate, tobramycin sulphate and nystatin as this is a new formulation. In reference literature, data concerning stability testing of drugs containing polymyxin/tobramycin/amphotericin - the most widely used SDD regimen to date – is limited.

Stability determinations/concentrations have therefore been assessed by HPLC and microbiology methods. Test methods have been developed and validated, and real-time ageing tests conducted to define safe storage parameters, including reasonably expected excursions.

The stability program for the SDD paste and SDD suspension is continually ongoing. The expiry date on the label will reflect the most recent shelf-life determination of the product contained within the syringe/bottle.

Current stability testing has demonstrated that:

1. SDD paste is stable at 2-8°C for up to 12 months.
2. SDD suspension is stable at 2-8°C for up to 2 weeks.
3. SDD powder for suspension is stable at 2-8°C for up to 12 months.
4. SDD paste, SDD powder for suspension and SDD suspension can be stored below 25°C for short excursions up to one week. (There is stability evidence up to one month, but this is not appropriate for the suspension because it is 'in use' at this stage. Suspension should be used as per the protocol once reconstituted.)

Refer to Appendices 2-8 for current stability results for SDD paste, SDD powder and SDD suspension.

## Reference list

1. van Saene HKF, Silvestri L, de la Cal MA, Gullo A, editors. Infection Control in the Intensive Care Unit [Internet]. Milano: Springer Milan; 2012 [cited 2018 Oct 26]. Available from: <http://link.springer.com/10.1007/978-88-470-1601-9>
2. Pathan N, Burmester M, Adamovic T, Berk M, Ng KW, Betts H, et al. Intestinal injury and endotoxemia in children undergoing surgery for congenital heart disease. *Am J Respir Crit Care Med* [Internet]. 2011;184(11):1261–9. Available from: <http://www.ncbi.nlm.nih.gov/pubmed/21868501>
3. van der Spoel HI, Gerritsen RT. SDD for the Prevention and Control of Outbreaks. Selective Digestive Tract Decontamination in Intensive Care Medicine: a Practical Guide to Controlling Infection [Internet]. Milano: Springer Milan; 2008 [cited 2018 Oct 26]. p. 141–54. Available from: [http://link.springer.com/10.1007/978-88-470-0653-9\\_11](http://link.springer.com/10.1007/978-88-470-0653-9_11)
4. Normand S, François B, Dardé M-L, Bouteille B, Bonnivard M, Preux P-M, et al. Oral nystatin prophylaxis of *Candida* spp. colonization in ventilated critically ill patients. *Intensive Care Med* [Internet]. 2005 Nov 30 [cited 2018 Oct 26];31(11):1508–13. Available from: <http://www.ncbi.nlm.nih.gov/pubmed/16195905>
5. Ruza F, Alvarado F, Herruzo R, Delgado MA, García S, Dorao P, et al. Prevention of nosocomial infection in a pediatric intensive care unit (PICU) through the use of selective digestive decontamination. *Eur J Epidemiol* [Internet]. 1998 Oct [cited 2018 Oct 25];14(7):719–27. Available from: <http://www.ncbi.nlm.nih.gov/pubmed/9849834>



Appendices

1. Verita Pharma most recent GMP Licence-MI-2016-LI-07350, dated 23 July 2020



Australian Government  
Department of Health  
Therapeutic Goods Administration

Licence to Manufacture Therapeutic Goods – Part 1

Licence Number:  
MI-2016-LI-07350-1

Granted to:  
Verita Pharma Pty Ltd  
ABN: 89 604 520 532

Manufacturing Site Address:  
Lot 8, 10 and 11 (SP92206), 2 Endeavour Road  
Caringbah NSW 2229

The manufacturer above is hereby authorised under Section 38 of the *Therapeutic Goods Act 1989* to carry out the following steps in the manufacture of therapeutic goods at the manufacturing site address specified above.

| Manufacturing Type   | Sterility             | Dosage Form             | Product Category                      | Manufacturing Step            |
|----------------------|-----------------------|-------------------------|---------------------------------------|-------------------------------|
| Medicine manufacture | Non Sterile           | Semi Solids             | Therapeutic Goods for Clinical Trials | Finished Product Manufacture  |
| Medicine manufacture | Non Sterile           | Semi Solids             | Registered Therapeutic Good           | Finished Product Manufacture  |
| Medicine manufacture | Non Sterile           | Powders Group           | Therapeutic Goods for Clinical Trials | Finished Product Manufacture  |
| Medicine manufacture | Non Sterile           | Powders Group           | Registered Therapeutic Good           | Finished Product Manufacture  |
| Medicine manufacture | Non Sterile           | Oral Liquid, suspension | Therapeutic Goods for Clinical Trials | Finished Product Manufacture  |
| Medicine manufacture | Non Sterile           | Oil                     | Therapeutic Goods for Clinical Trials | Finished Product Manufacture  |
| Medicine manufacture | Non Sterile           | Spray                   | Therapeutic Goods for Clinical Trials | Finished Product Manufacture  |
| Medicine manufacture | Sterile & Non Sterile | All Dosage Forms        | Not Applicable                        | Testing chemical and physical |

This Licence is the property of the Therapeutic Goods Administration and must be returned or destroyed upon demand.  
This Licence remains valid until otherwise suspended or revoked by the Therapeutic Goods Administration.  
The status of an Australian Licence may be viewed at <https://www.dhs.tga.gov.au/>.

PO Box 180 Woden ACT 2606 ABN 40 939 486 804  
Phone: 1800 820 653 Fax: 62 6203 1605 Email: [info@tga.gov.au](mailto:info@tga.gov.au) [www.tga.gov.au](http://www.tga.gov.au)

TGA

Health Safety  
Regulation

Page 1 of 2



Australian Government  
Department of Health  
Therapeutic Goods Administration

Licence to Manufacture Therapeutic Goods – Part 1

Licence Number:  
MI-2016-LI-07350-1

| Manufacturing Type   | Sterility | Dosage Form | Product Category                      | Manufacturing Step                   |
|----------------------|-----------|-------------|---------------------------------------|--------------------------------------|
| Medicine manufacture | Sterile   | Injections  | Compounded Medicine                   | Sterile Finished Product Manufacture |
| Medicine manufacture | Sterile   | Injections  | Therapeutic Goods for Clinical Trials | Sterile Finished Product Manufacture |

This licence is subject to the requirements of the *Therapeutic Goods Act 1989*, and its Regulations.  
Section 40(4) of the *Therapeutic Goods Act 1989* and Regulation 19, 20, 21 and 22 of the *Therapeutic Goods Regulations 1990* impose various statutory conditions on all licences to manufacture therapeutic goods.  
In addition to that, the specific conditions mentioned in Part 2 of this licence have been imposed under Section 40(1) or 40(2) of the *Therapeutic Goods Act 1989*.

Originally Granted: 16 May 2017

Date Revised: 23 July 2020

This Licence is the property of the Therapeutic Goods Administration and must be returned or destroyed upon demand.  
This Licence remains valid until otherwise suspended or revoked by the Therapeutic Goods Administration.  
The status of an Australian Licence may be viewed at <https://www.dhs.tga.gov.au/>.

PO Box 180 Woden ACT 2606 ABN 40 939 486 804  
Phone: 1800 820 653 Fax: 62 6203 1605 Email: [info@tga.gov.au](mailto:info@tga.gov.au) [www.tga.gov.au](http://www.tga.gov.au)

TGA

Health Safety  
Regulation

Page 2 of 2

Brown A, et al. BMJ Open 2022; 12:e061838. doi: 10.1136/bmjopen-2022-061838

## 2. SDD Oral Paste 5°C R&amp;D Stability Summary

Form No: TF2402-01

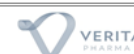**R&D Stability Report**

|                                                            |                                       |                                           |
|------------------------------------------------------------|---------------------------------------|-------------------------------------------|
| Product Name: <b>SDD Oral Paste</b>                        | Product Code: <b>FP002</b>            | Company Name: <b>The George Institute</b> |
| Dosage Form: <b>Paste</b>                                  | Batch No: <b>241117</b>               | Stability Study: <b>SP-0001-03</b>        |
| Packaging: <b>BD oral/enteral 1 ml syringe and tip cap</b> | Storage Temperature: <b>5°C ± 3°C</b> | Humidity: <b>N/A</b>                      |

| Time points             |                                                                                                                                          | Initial      | 2 w               | 4 w          | 12 w         | 16 w         | 6 M          | 9 M       | 12M          |
|-------------------------|------------------------------------------------------------------------------------------------------------------------------------------|--------------|-------------------|--------------|--------------|--------------|--------------|-----------|--------------|
| Due date                |                                                                                                                                          | 27/11/17     | 11/12/17          | 08/01/18     | 19/02/18     | 19/03/18     | 27/05/18     | 27/08/18  | 27/11/18     |
| Test                    | Specifications                                                                                                                           |              |                   |              |              |              |              | Cancelled |              |
| Appearance              | Light yellow paste                                                                                                                       | complies     | complies          | complies     | complies     | complies     | complies     |           | complies     |
| Viscosity               | TBD                                                                                                                                      | 128,000 cps  | 157,000 cps       | 158,000 cps  | 150,333 cps  | 198,000 cps  | 198,000 cps  |           | 180,000 cps  |
| Nystatin Assay          | 250,000 IU/g<br><small>Assay precision (RSD) limits: 98-108%<br/>UPL: NLT 90% of stated IU<br/>LEL: NMT 116 % of stated IU</small>       | 243,621 IU/g | Not available (*) | 242,806 IU/g | 243,996 IU/g | 244,270 IU/g | 249,698 IU/g |           | 245,342 IU/g |
| Colistin Sulphate Assay | 20 mg/g<br><small>Assay precision (RSD) limits: 98-108%<br/>UPL: NLT 97% of stated mg<br/>LEL: NMT 110 % of stated mg</small>            | 20.1 mg/g    | Not available (*) | 19.5 mg/g    | 19.6 mg/g    | 19.7 mg/g    | 19.9 mg/g    |           | 20.0 mg/g    |
| Tobramycin Assay        | 20 mg/g<br><small>18 mg/g - 24 mg/g</small>                                                                                              | 20.24 mg/g   | 21.0 mg/g         | 20.4 mg/g    | 20.56 mg/g   | 21.20 mg/g   | 21.65 mg/g   |           | 20.20 mg/g   |
| Microbiological quality | Complies<br><small>TAMC: 10<sup>6</sup> CFU/g<br/>TYMC: 10<sup>5</sup> CFU/g<br/>S aureus: Absence/g<br/>P aeruginosa: Absence/g</small> | Complies     |                   |              | complies     | complies     |              |           | complies     |
| PET                     | Complies                                                                                                                                 |              |                   |              |              |              |              |           | Complies USP |
| Date completed          |                                                                                                                                          | 19/12/17     | 28/12/17          | 17/01/18     | 08/03/18     | 10/04/18     | 14/06/18     |           | 05/04/2019   |

Comments: The tests with (\*) have not been performed.

Checked By: \_\_\_\_\_ (Sign and Date)

Authorised By QA Manager: \_\_\_\_\_

(Sign and Date)

## 3. SDD Oral Paste 25°C-60%RH R&amp;D Stability

Form No: TF2402-01

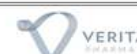**R&D Stability Report**

|                                                     |                                 |                                    |
|-----------------------------------------------------|---------------------------------|------------------------------------|
| Product Name: SDD Oral Paste                        | Product Code: FP002             | Company Name: The George Institute |
| Dosage Form: Paste                                  | Batch No: 241117                | Stability Study: SP-0001-03        |
| Packaging: BD oral/enteral 1 ml syringe and tip cap | Storage Temperature: 25°C ± 2°C | Humidity: 60 %RH ± 5% RH           |

| Time points             |                                                                                                                                          | Initial      | 8 weeks      | 12 weeks     |  |  |  |  |  |
|-------------------------|------------------------------------------------------------------------------------------------------------------------------------------|--------------|--------------|--------------|--|--|--|--|--|
| Due date                |                                                                                                                                          | 27/11/17     | 22/01/18     | 19/02/18     |  |  |  |  |  |
| Test                    | Specifications                                                                                                                           |              |              |              |  |  |  |  |  |
| Appearance              | Light yellow paste                                                                                                                       | complies     | complies     | complies     |  |  |  |  |  |
| Viscosity               | TBD                                                                                                                                      | 128,000 cps  | 124,000 cps  | 123,000 cps  |  |  |  |  |  |
| Nystatin Assay          | 250,000 IU/g<br><small>Assay precision (relative limits): 98-108%<br/>UPL: NLT 90% of stated IU<br/>LPL: NMT 118 % of stated IU</small>  | 243,621 UI/g | 241.968 UI/g | 241.161 UI/g |  |  |  |  |  |
| Colistin Sulphate Assay | 20 mg/g<br><small>Assay precision (relative limits): 98-108%<br/>UPL: NLT 97% of stated mg<br/>LPL: NMT 110 % of stated mg</small>       | 20.1 mg/g    | 19.8 mg/g    | 19.7 mg/g    |  |  |  |  |  |
| Tobramycin Assay        | 20 mg/g<br><small>15 mg/g - 24 mg/g</small>                                                                                              | 20.24 mg/g   | 20.40 mg/g   | 20.87 mg/g   |  |  |  |  |  |
| Microbiological quality | Complies<br><small>TAMC: 10<sup>6</sup> CFU/g<br/>TYMC: 10<sup>6</sup> CFU/g<br/>S aureus: Absence/g<br/>P aeruginosa: Absence/g</small> | Complies     |              | Complies     |  |  |  |  |  |
| PET                     | Complies USP requirements                                                                                                                |              | Complies     |              |  |  |  |  |  |
| Date completed          |                                                                                                                                          | 19/12/17     | 08/03/18     | 08/03/18     |  |  |  |  |  |

Comments: \_\_\_\_\_

Checked By: \_\_\_\_\_ (Sign and Date)

Authorised By QA Manager: \_\_\_\_\_ (Sign and Date)

## 4. SDD Powder for Suspension 5°C R&amp;D Stability

Form No: TF2402-01

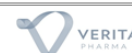

## R&amp;D Stability Report

|                                                                 |                                       |                                           |
|-----------------------------------------------------------------|---------------------------------------|-------------------------------------------|
| Product Name: <b>SDD Powder for Suspension</b>                  | Product Code: <b>FP001</b>            | Company Name: <b>The George Institute</b> |
| Dosage Form: <b>Powder</b>                                      | Batch No: <b>Int001071117</b>         | Stability Study: <b>SP-0002-05</b>        |
| Packaging: <b>Amber Plastic bottle with Child Resistant Cap</b> | Storage Temperature: <b>5°C ± 3°C</b> | Humidity: <b>N/A</b>                      |

| Time points                                                      |                                                                                                                                        | Initial       | 2 w           | 4 w               | 9 w           | 12 w          | 18 w          | 6 M           | 9 M       | 12 M          |
|------------------------------------------------------------------|----------------------------------------------------------------------------------------------------------------------------------------|---------------|---------------|-------------------|---------------|---------------|---------------|---------------|-----------|---------------|
| Due date                                                         |                                                                                                                                        | 15/11/17      | 29/11/17      | 13/12/17          | 17/01/18      | 07/02/18      | 21/03/18      | 15/05/18      | 15/08/18  | 15/11/18      |
| Test                                                             | Specifications                                                                                                                         |               |               |                   |               |               |               |               | Cancelled |               |
| Appearance                                                       | pale yellow powder                                                                                                                     | complies      | complies      | complies          | complies      | complies      | complies      | complies      |           | complies      |
| Loss on Drying                                                   | TBD                                                                                                                                    | 5.63 %        | 4.98 %        | 6.47 %            | 5.19 %        | 5.72 %        | 5.14 %        | 6.52 %        |           | 5.75 %        |
| pH<br><small>(after reconstitution)</small>                      | 4.0 – 5.0                                                                                                                              | 4.49          | 4.71          | 4.63              | 4.58          | 4.45          | 4.32          | 4.54          |           | 4.53          |
| Nystatin Assay<br><small>(after reconstitution)</small>          | 200,000 IU/ml<br><small>Assay precision fiducial limits: 95-105%<br/>UPL: NLT 95% of stated IU<br/>LPL: HMT 120 % of stated IU</small> | 206,182 IU/ml | 200,288 IU/ml | Not available (*) | 205,602 IU/ml | 203,390 IU/ml | 200,970 IU/ml | 205,321 IU/ml |           | 202,614 IU/ml |
| Colistin Sulphate Assay<br><small>(after reconstitution)</small> | 10 mg/ml<br><small>Assay precision fiducial limits: 95-105%<br/>UPL: NLT 97% of stated mg<br/>LPL: HMT 110 % of stated mg</small>      | 10.2 mg/ml    | 9.8 mg/ml     | Not available (*) | 9.5 mg/ml     | 9.9 mg/ml     | 9.9 mg/ml     | 10.2 mg/ml    |           | 10.1 mg/ml    |
| Tobramycin Assay<br><small>(after reconstitution)</small>        | 8 mg/ml<br><small>7.2 mg/g – 9.0 mg/g</small>                                                                                          | 8.73 mg/ml    | 8.87 mg/ml    | 8.84mg/ml         | 8.66 mg/ml    | 8.85 mg/ml    | 8.18 mg/ml    | 8.75 mg/ml    |           | 8.09 mg/ml    |
| Microbiological quality<br><small>(after reconstitution)</small> | Complies<br><small>TAMC: 10<sup>6</sup> CFU/g<br/>TYMC: 10<sup>5</sup> CFU/g<br/>E.coli: Absence/g</small>                             | complies      |               |                   |               | complies      | complies      |               |           | complies      |
| PET<br><small>(after reconstitution)</small>                     | Complies                                                                                                                               |               |               |                   |               |               |               |               |           | complies      |
| Date completed                                                   |                                                                                                                                        | 05/12/17      | 22/12/17      | 02/01/18          | 19/01/18      | 08/03/18      | 12/04/18      | 13/06/18      |           | 29/01/2019    |

Comments: *The tests with (\*) have not been performed.*

Checked By: \_\_\_\_\_ (Sign and Date)

Authorised By QA Manager: \_\_\_\_\_

(Sign and Date)

## 5. SDD Powder for Suspension 25°C-60%RH R&amp;D Stability

Form No: TF2402-01

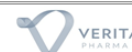**R&D Stability Report**

|                                                                 |                                        |                                           |
|-----------------------------------------------------------------|----------------------------------------|-------------------------------------------|
| Product Name: <b>SDD Powder for Suspension</b>                  | Product Code: <b>FP001</b>             | Company Name: <b>The George Institute</b> |
| Dosage Form: <b>Powder</b>                                      | Batch No: <b>Int001071117</b>          | Stability Study: <b>SP-0002-05</b>        |
| Packaging: <b>Amber Plastic bottle with Child Resistant Cap</b> | Storage Temperature: <b>25°C ± 2°C</b> | Humidity: <b>60% RH</b>                   |

| Time points                                                             |                                                                                                                                        | Initial       | 8 w           | 12 w          |  |  |  |  |  |
|-------------------------------------------------------------------------|----------------------------------------------------------------------------------------------------------------------------------------|---------------|---------------|---------------|--|--|--|--|--|
| Due date                                                                |                                                                                                                                        | 15/11/17      | 10/01/18      | 07/02/18      |  |  |  |  |  |
| Test                                                                    | Specifications                                                                                                                         |               |               |               |  |  |  |  |  |
| <b>Appearance</b>                                                       | pale yellow powder                                                                                                                     | complies      | complies      | complies      |  |  |  |  |  |
| <b>Loss on Drying</b>                                                   | TBD                                                                                                                                    | 5.63          | 5.72          | 5.29          |  |  |  |  |  |
| <b>pH</b><br><small>(after reconstitution)</small>                      | 4.0 – 5.0                                                                                                                              | 4.49          | 4.64          | 4.68          |  |  |  |  |  |
| <b>Nystatin Assay</b><br><small>(after reconstitution)</small>          | 200,000 IU/ml<br><small>Assay precision fiducial limits: 95-105%<br/>UPL: NLT 95% of stated IU<br/>LPL: NMT 120 % of stated IU</small> | 206,182 IU/ml | 203,811 IU/ml | 199,917 IU/ml |  |  |  |  |  |
| <b>Colistin Sulphate Assay</b><br><small>(after reconstitution)</small> | 10 mg/ml<br><small>Assay precision fiducial limits: 95-105%<br/>UPL: NLT 97% of stated mg<br/>LPL: NMT 110 % of stated mg</small>      | 10.2 mg/ml    | 10.0 mg/ml    | 9.8 mg/ml     |  |  |  |  |  |
| <b>Tobramycin Assay</b><br><small>(after reconstitution)</small>        | 8 mg/ml<br><small>7.2 mg/g – 9.6 mg/g</small>                                                                                          | 8.73 mg/ml    | 8.65 mg/ml    | 8.57 mg/ml    |  |  |  |  |  |
| <b>Microbiological quality</b><br><small>(after reconstitution)</small> | Complies<br><small>TAMC: 10<sup>6</sup> CFU/g<br/>TYMC: 10<sup>6</sup> CFU/g<br/>E.coli: Absence/g</small>                             | complies      |               | complies      |  |  |  |  |  |
| <b>PET</b><br><small>(after reconstitution)</small>                     | Complies                                                                                                                               |               | Complies      |               |  |  |  |  |  |
| <b>Date completed</b>                                                   |                                                                                                                                        | 05/12/17      | 08/03/18      | 08/03/18      |  |  |  |  |  |

Comments: \_\_\_\_\_

Checked By: \_\_\_\_\_ (Sign and Date)

Authorised By QA Manager: \_\_\_\_\_

(Sign and Date)

## 6. SDD Suspension 5°C R&amp;D Stability

Form No: TF2402-01

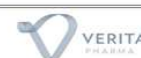**R&D Stability Report**

|                                                                 |                                       |                                           |
|-----------------------------------------------------------------|---------------------------------------|-------------------------------------------|
| Product Name: <b>SDD Suspension</b>                             | Product Code: <b>N/A</b>              | Company Name: <b>The George Institute</b> |
| Dosage Form: <b>Suspension</b>                                  | Batch No: <b>FP001071117</b>          | Stability Study: <b>SP-0003-02</b>        |
| Packaging: <b>Amber Plastic bottle with Child Resistant Cap</b> | Storage Temperature: <b>5°C ± 3°C</b> | Humidity: <b>N/A</b>                      |

| Time points                                              |                                                                                                                       | Initial       | 1 w           | 2 w           | 3 w           | 1 M           | 1.5 M             | 2 M           |  |
|----------------------------------------------------------|-----------------------------------------------------------------------------------------------------------------------|---------------|---------------|---------------|---------------|---------------|-------------------|---------------|--|
| Due date                                                 |                                                                                                                       | 15/11/17      | 22/11/17      | 29/11/17      | 06/12/17      | 15/12/17      | 01/01/18          | 15/01/18      |  |
| Test                                                     | Specifications                                                                                                        |               |               |               |               |               |                   |               |  |
| Appearance                                               | After shaking, a yellow liquid                                                                                        | complies      | complies      | complies      | complies      | complies      | complies          | complies      |  |
| pH<br><i>(after reconstitution)</i>                      | 4.0 – 5.0                                                                                                             | 4.50          | 4.47          | 4.54          | 4.47          | 4.61          | 4.45              | 4.55          |  |
| Nystatin Assay<br><i>(after reconstitution)</i>          | 200,000 IU/ml<br>Assay precision (doucal) limits: 95-105%<br>UFL: NLT 95% of stated IU<br>LFL: NMT 120 % of stated IU | 206,182 IU/ml | 205,268 IU/ml | 201,465 IU/ml | 204,480 IU/ml | 204,835 IU/ml | Not available (*) | 207,986 IU/ml |  |
| Colistin Sulphate Assay<br><i>(after reconstitution)</i> | 10 mg/ml<br>Assay precision (doucal) limits: 95-105%<br>UFL: NLT 97% of stated mg<br>LFL: NMT 110 % of stated mg      | 10.2 mg/ml    | 9.8 mg/ml     | 9.9 mg/ml     | 9.8 mg/ml     | 9.8 mg/ml     | Not available (*) | 10.1 mg/ml    |  |
| Tobramycin Assay<br><i>(after reconstitution)</i>        | 8 mg/ml<br>7.2 mg/g – 9.0 mg/g                                                                                        | 8.68 mg/ml    | 8.77 mg/ml    | 8.77 mg/ml    | 8.57 mg/ml    | 8.79 mg/ml    | 8.72 mg/ml        | 8.44 mg/ml    |  |
| Microbiological quality<br><i>(after reconstitution)</i> | Complies<br>TAMC: 10 <sup>6</sup> CFU/g<br>TYMC: 10 <sup>6</sup> CFU/g<br>E.coli: Absence/g                           | complies      |               |               |               |               |                   | complies      |  |
| PET<br><i>(after reconstitution)</i>                     | Complies USP requirements                                                                                             |               |               |               |               |               |                   | complies      |  |
| Date completed                                           |                                                                                                                       | 05/12/17      | 14/12/17      | 20/12/17      | 22/12/17      | 16/01/18      | 16/01/18          | 07/03/18      |  |

Comments: *The tests with (\*) have not been performed.*

Checked By: \_\_\_\_\_ (Sign and Date)

Authorised By QA Manager: \_\_\_\_\_ (Sign and Date)

## 7. SDD Suspension NF 25°C- 60%RH

|                                                                                   |                  |             |
|-----------------------------------------------------------------------------------|------------------|-------------|
|  | Stability Report | Page 1 of 1 |
|-----------------------------------------------------------------------------------|------------------|-------------|

|                                                                                    |                                        |                                           |
|------------------------------------------------------------------------------------|----------------------------------------|-------------------------------------------|
| Product Name: <b>SDD Suspension NF</b>                                             | Product Code: <b>N/A</b>               | Company Name: <b>The George Institute</b> |
| Dosage Form: <b>suspension</b>                                                     | Batch No: <b>1810005</b>               | Stability Study: <b>SP-0006-01</b>        |
| Packaging: <b>240 ml amber plastic bottle with adapter and child resistant cap</b> | Storage Temperature: <b>25°C ± 2°C</b> | Humidity: <b>65 % RH ± 5 %RH</b>          |

| Time points             |                                                                                                                                        | Initial       | 1 W           | 2 W           | 4 W           |
|-------------------------|----------------------------------------------------------------------------------------------------------------------------------------|---------------|---------------|---------------|---------------|
| Due date                |                                                                                                                                        |               | 29/01/19      | 01/02/19      | 18/02/19      |
| Test                    | Specifications                                                                                                                         |               |               |               |               |
| Appearance              | After shaking, a yellow liquid                                                                                                         | complies      | complies      | complies      | complies      |
| pH                      | 4.0 – 5.0                                                                                                                              | 4.58          | 4.50          | 4.59          | 4.72          |
| Nystatin Assay          | 200,000 IU/ml<br><small>Assay precision fiducial limits: 95-105%<br/>UFL: NLT 95% of stated IU<br/>LFL: NMT 120 % of stated IU</small> | 204,141 IU/ml | 199,838 IU/ml | 200,830 IU/ml | 202,077 IU/ml |
| Colistin Sulphate Assay | 10 mg/ml<br><small>Assay precision fiducial limits: 95-105%<br/>UFL: NLT 97% of stated mg<br/>LFL: NMT 110 % of stated mg</small>      | 10.4 mg/ml    | 10.0 mg/ml    | 9.7 mg/ml     | 9.7 mg/ml     |
| Tobramycin Assay        | 8 mg/ml<br><small>7.2 mg/g – 9.6 mg/g</small>                                                                                          | 7.81 mg/ml    | 8.53 mg/ml    | 7.97 mg/ml    | 8.00 mg/ml    |
| Microbiological quality | Complies<br><small>TAMC: 10<sup>6</sup> CFU/g<br/>TYMC: 10<sup>4</sup> CFU/g<br/># cell: Absence/g</small>                             | complies      |               |               | complies      |
| PET                     | Complies                                                                                                                               |               |               |               | complies      |
| Date completed          |                                                                                                                                        | 08/11/2019    | 14/02/2019    | 20/02/2019    | 03/04/2019    |

Comments: \_\_\_\_\_

Checked By: \_\_\_\_\_ (Sign and Date)      Authorised By QA Manager: \_\_\_\_\_ (Sign and Date)

© Copyright - Verita Pharma

Information contained herein this document is the property of Verita Pharma - unauthorised disclosure to the public is prohibited.



## 8. Syrspend SF pH4 Dry – 30% reduction in SDD Powder for Suspension Formulation

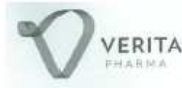

### Syrspend SF pH4 Dry — 30% reduction in SDD Powder for Suspension Formulation

The current SDD Powder for Suspension contains 13.65g of Syrspend SF pH4 Dry (Syrspend SF), per bottle. Some sites currently part of the SuDDICU Clinical Trial, are finding some difficulty when reconstituting and using the suspension due to the thickness of the reconstituted product. The proposal is to reduce the quantity of Syrspend SF by 30% to 9.56g per bottle.

Syrspend SF is a starch based, preservative free suspending vehicle. The Syrspend SF contains;  
Modified Food

Starch (viscosity agent), Sucralose (sweetener) and a citrate/citric acid (buffer). The material allows the Active Pharmaceutical Ingredients (API's) to stay suspended and easy to (re)homogenise and is practically inert for chemical actions.

There are 3 API's in the SDD Suspension; Colistin Sulphate and Tobramycin Sulphate which are soluble in water and therefore dissolved in the suspension, and Nystatin which is suspended in the mixture and rehomogenised after shaking. The inert nature of the Syrspend SF means there should be no chemical interaction and therefore the efficacy of the drug remains the same. The microbiological stability of the product is maintained by the addition of Potassium Sorbate and Citric Acid to the powder blend. Both of these materials are dissolved in the water and the concentration of these materials will not change with the 30% reduction of Syrspend SF.

The reduction of the Syrspend SF quantity according to the supplier's procedure for use, falls within the recommended range of Water / Syrspend SF ratio.

On review with a quality consultant, Cathrine Dahlgren from CNQuality, it was concluded that the Syrspend SF reduction would not influence the activity of the 3 API's or the chemical and microbiological stability.

Based on the information reviewed it was determined that the current stability studies completed on the SDD Powder for Suspension and SDD Suspension (reconstituted) would be valid for the new formulation with a 30% reduction Syrspend SF. We are required to and will complete concurrent stability studies on the new formulation. The protocols have been written and are being approved.

Regards,

A handwritten signature in blue ink, appearing to read 'Martina Bachmaier', followed by the date '29.09.2018' written in the same ink.

Martina Bachmaier

General Manager

VERITA PHARMA PTY LTD ABN 89 804 520 532

UNIT 3/4 ENDEAVOUR ROAD CARINGBAH NSW 2229

PO BOX 2502 TAREN POINT NSW 2229

\*612 8536 4130 | INFO@VERITAPHARMA.COM.AU | WWW.VERITAPHARMA.COM.AU



## 9. PICnIC Labels (Box, SDD oral paste, SDD suspension)

**KEEP OUT OF REACH OF CHILDREN**

**FOR CLINICAL TRIAL USE ONLY**

**CHIEF INVESTIGATOR:** Dr Nazima Pathan  
**SPONSOR:** University of Cambridge & Cambridge University Hospitals NHS Trust  
 Addenbrookes Hospital, Hills Road, Cambridge CB2 0QQ  
 Tel: 01223 245151  
**PROTOCOL:** PICnIC (REC 20/WM/0061)

**BOX CONTAINS:**  
 1 x Bottle of SDD Gastric Powder for Suspension (Total volume once reconstituted 210ml)  
 When reconstituted each 10ml contains: 2,000,000 units Nystatin, 100mg Colistin Sulfate, 80mg Tobramycin (as Sulfate)  
 20 x syringes of 500mg SDD Oral Paste  
 Each syringe contains: 10mg Colistin Sulfate, 10mg Tobramycin (as Sulfate) and 125,000 units Nystatin  
 Directions for use and reconstitution: Per the PICnIC protocol  
 Storage Conditions: Store at 2-8°C Do Not Freeze  
 In use: May be stored at up to 25°C for up to 5 days from date dispensed below.

**FOR HOSPITAL USE:**  
 Patient Trial Number: \_\_\_\_\_  
 Patient Full Name: \_\_\_\_\_  
 Date dispensed: \_\_\_\_/\_\_\_\_/\_\_\_\_  
 Use by: \_\_\_\_/\_\_\_\_/\_\_\_\_

Batch #: \_\_\_\_\_ Kit #: \_\_\_\_\_

Expiry: \_\_\_\_\_

ITEM M-XXX-01

**Keep out of reach of children**

**SDD ORAL PASTE 500mg**

**SINGLE USE ONLY**  
**FOR CLINICAL TRIAL USE ONLY**  
 Each syringe contains: 10mg Colistin Sulfate, 10mg Tobramycin (as Sulfate) and 125,000 units Nystatin

Batch: \_\_\_\_\_ Store at 2-8°C  
 Expiry: \_\_\_\_\_ In use storage: <25°C up to 5 days  
 Patient Trial No.: \_\_\_\_\_

ITEM M-XXX-01

**Keep out of reach of children**

**SDD GASTRIC POWDER FOR SUSPENSION (200ml)**

**SHAKE WELL BEFORE USE**  
 FOR CLINICAL TRIAL USE ONLY  
 Protocol: PICnIC (REC 20/WM/0061)

**BATCH:** \_\_\_\_\_  
**EXPIRY:** \_\_\_\_\_

**Patient Trial No.:** \_\_\_\_\_  
**ONCE RECONSTITUTED DISCARD AFTER:** \_\_\_\_/\_\_\_\_/\_\_\_\_

**Sponsor:**  
 University of Cambridge & Cambridge University Hospitals NHS Trust

**WHEN RECONSTITUTED EACH 10ml CONTAINS:**  
 2,000,000 units Nystatin, 100mg Colistin Sulfate, 80mg Tobramycin (as Sulfate)  
 Store at 2-8°C  
 For oral use as directed by PICnIC protocol  
 Once reconstituted, may be stored at room temperature (up to 25°C) for up to 5 days.

ITEM M-XXX-01
